# Supplementary material
Source: HighWire-hosted journal article supplement (https://bmjopen.bmj.com/content/15/1/e088944)
Supplement: inline-supplementary-material-1 [file inline-supplementary-material-1.pdf]

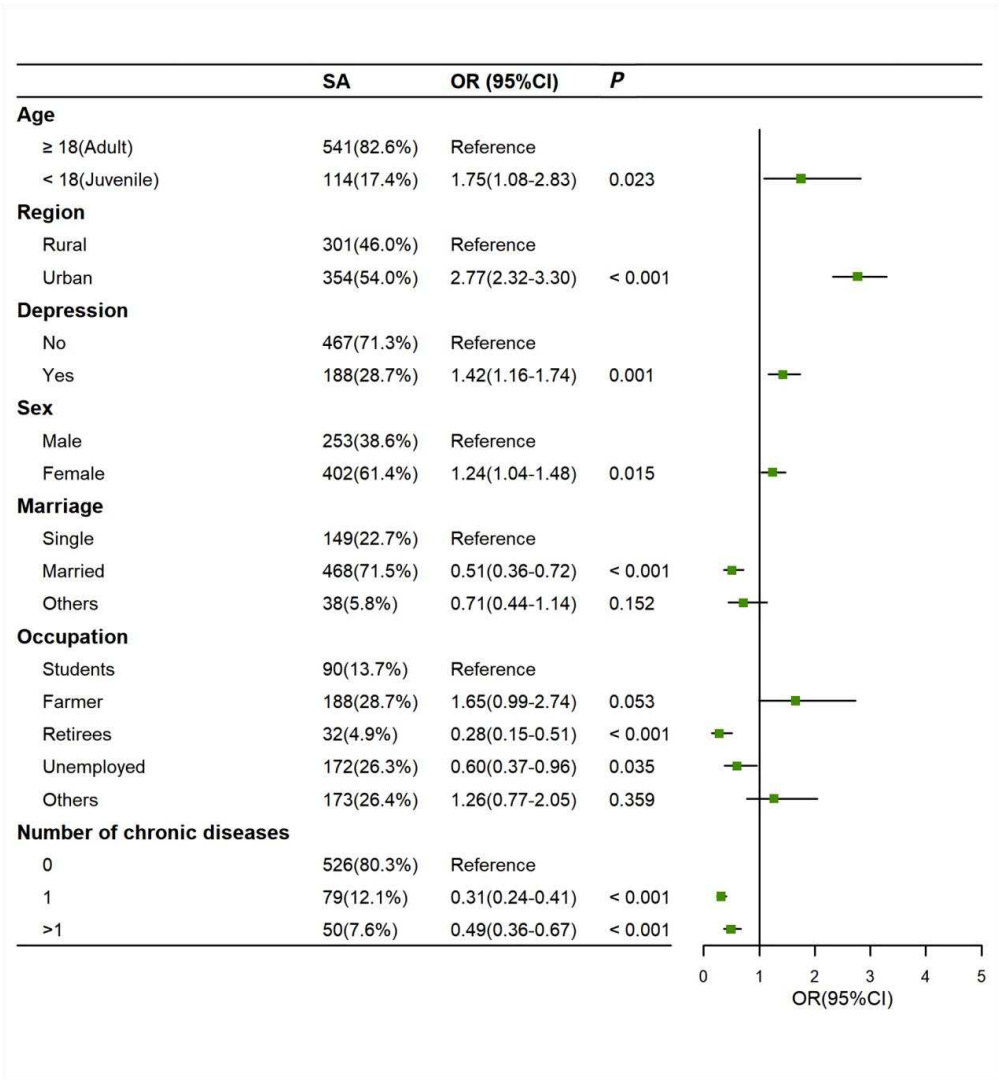

Supplementary Figure 1. Logistic regression analysis between all variables and SA (n =7,593)

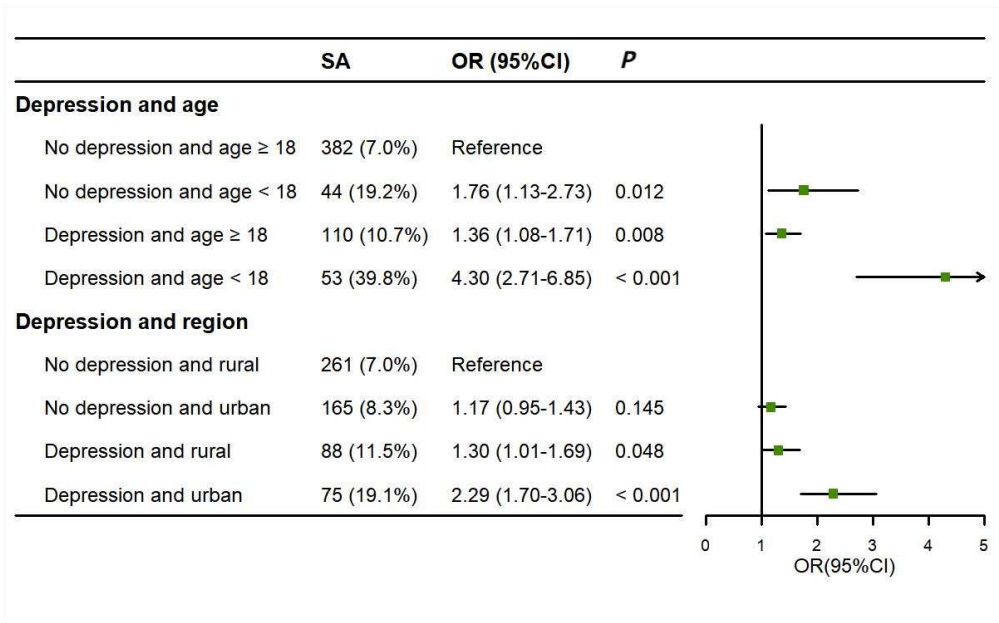

Supplementary Figure 2. Bootstrap analysis of association between depression and SA at 90% (n = 6,834)

Note. Confounding factors such as sex, occupation, and chronic diseases were adjusted.

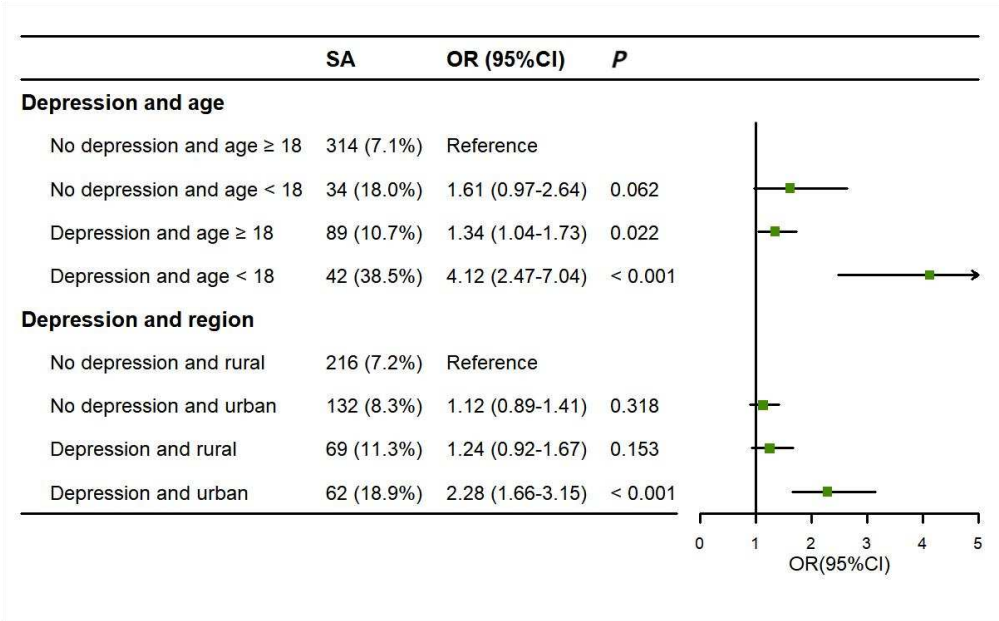

Supplementary Figure 3. Bootstrap analysis of association between depression and SA at 80% (n = 6,074)

Note. Confounding factors such as sex, occupation, and chronic diseases were adjusted.

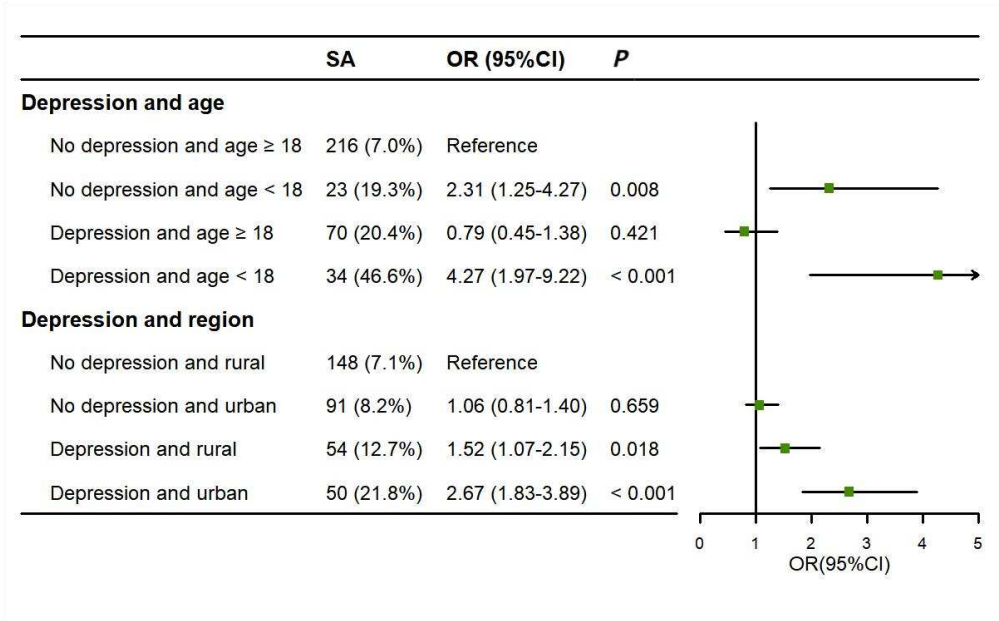

Supplementary Figure 4. Bootstrap analysis of association between depression and SA at 70% (n = 5,315)

Note. Confounding factors such as sex, occupation, and chronic diseases were adjusted.

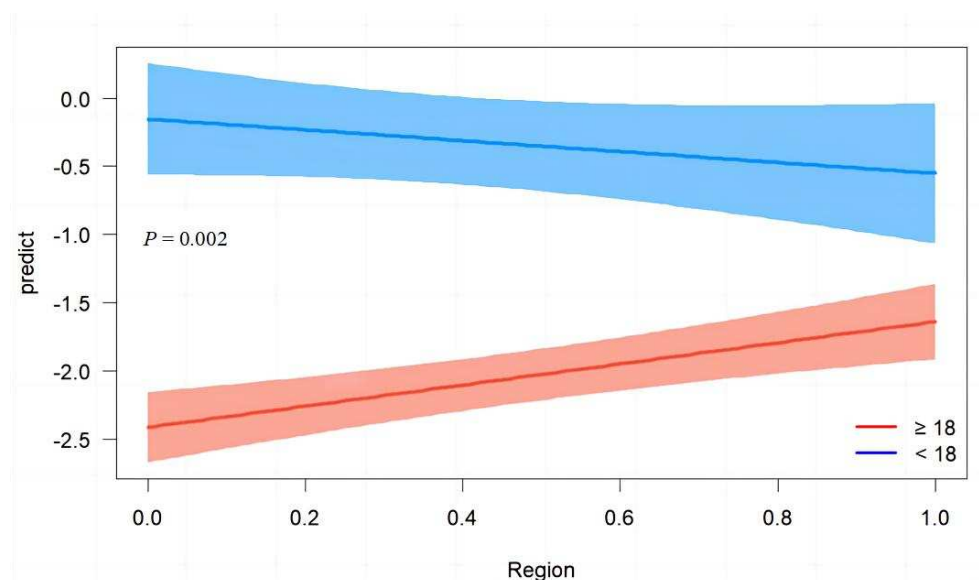

Supplementary Figure 5. Interaction between age and region on SA in depressed patients (n=1,290)
